# Supplementary material for: Successful implementation of best medical treatment for patients with asymptomatic carotid artery stenosis within a randomized controlled trial (SPACE-2)
Source: PubMed Central journal article supplement (PMC8524978; doi:10.1186/s42466-021-00153-w), 2021-10-19
Supplement: 42466_2021_153_MOESM1_ESM.pdf [file 42466_2021_153_MOESM1_ESM.pdf]

# Successful implementation of best medical treatment for patients with asymptomatic carotid artery stenosis within a randomized controlled trial (SPACE-2).

## Supplemental Tables

**Table S1:** Prespecified treatment goals for vascular risk factors in SPACE-2 (already published[1]).

| Risk factor                       | Treatment target                              |
|-----------------------------------|-----------------------------------------------|
| Smoking                           | cessation                                     |
| Fasting total cholesterol         | <200mg/dl                                     |
| LDL cholesterol (no CHD)          | <130mg/dl                                     |
| LDL cholesterol (with CHD)        | <100mg/dl                                     |
| HDL cholesterol                   | ≥40mg/dl                                      |
| Triglycerides                     | <150mg/dl                                     |
| Overweight BMI 25-27.5            | weight loss until BMI <25                     |
| Overweight BMI >27.5              | 10% weight loss                               |
| Blood pressure (without diabetes) | ≤130/85 mm Hg                                 |
| Blood pressure (with diabetes)    | ≤130/80 mm Hg                                 |
| Diabetes mellitus                 | HbA1c<7%                                      |
| Physical activity                 | At least 30 min. of physical activity 3x/week |
| Alcohol consumption               | male <30g/day, female <15g/day                |

CHD: coronary heart disease; BMI: body mass index; LDL: low density lipoprotein; HDL: high density lipoprotein.

**Table S2:** Nonsmoking rates and avoidance of obesity over time; n=513.

|                                       | CEA (% [n])      | CAS (%[n])      | BMT (%[n])    | total (%[n])  | $p^2$              | $p^3$                 |
|---------------------------------------|------------------|-----------------|---------------|---------------|--------------------|-----------------------|
| Packyears <sup>1</sup> (median [IQR]) | 24.3 (11.25; 40) | 31.5 (15.6; 49) | 30 (11.5; 44) | 28.5 (13; 45) | 0.108 <sup>◊</sup> |                       |
| Non-smokers                           |                  |                 |               |               |                    |                       |
| D0                                    | 77.2% (152)      | 84.1% (164)     | 78.6% (88)    | 80.2% (404)   | 0.202 <sup>-</sup> |                       |
| D30                                   | 82.0% (109)      | 85.8% (121)     | 76.9% (70)    | 82.2% (300)   | 0.224 <sup>-</sup> | <0.0001 <sup>^*</sup> |
| M6                                    | 80.7% (109)      | 88.3% (128)     | 83.0% (83)    | 84.7% (322)   | 0.209 <sup>-</sup> | <0.0001 <sup>^*</sup> |
| A1                                    | 83.3% (120)      | 89.6% (129)     | 81.1% (77)    | 85.1% (326)   | 0.145 <sup>-</sup> | <0.0001 <sup>^*</sup> |
| BMI <25                               |                  |                 |               |               |                    |                       |
| D0                                    | 24.0% (47)       | 23.6% (46)      | 28.8% (32)    | 24.9% (125)   | 0.553 <sup>-</sup> |                       |
| D30                                   | 24.5% (45)       | 23.7% (42)      | 33.3% (34)    | 26.1% (121)   | 0.171 <sup>-</sup> | 0.8318 <sup>^</sup>   |
| M6                                    | 26.1% (46)       | 22.4% (39)      | 29.5% (31)    | 25.5% (116)   | 0.406 <sup>-</sup> | 1.0000 <sup>^</sup>   |
| A1                                    | 27.1% (46)       | 25.7% (43)      | 25.5% (26)    | 26.2% (115)   | 0.947 <sup>-</sup> | 0.2962 <sup>^</sup>   |

\*significant; <sup>◊</sup>Kruskal–Wallis test; <sup>-</sup>Chi<sup>2</sup>-Test; <sup>^</sup>McNemar's test; BMI: Body mass index; <sup>1</sup>screening visit; D0: Screening visit; D30: Visit after 30 days; M6: Visit after six months; A1: Visit after one year; <sup>2</sup>testing CEA vs. CAS vs. BMT; <sup>3</sup>testing total value D30/M6/A1 vs. D0 visit.

**Table S3:** Medication from screening visit to one year, comparison between groups and over time; n=513.

|                                            | CEA (% [n]) | CAS (%[n])  | BMT (%[n])  | total (%[n]) | $p^3$                | $p^4$                 |
|--------------------------------------------|-------------|-------------|-------------|--------------|----------------------|-----------------------|
| <b>Antiplatelets</b>                       |             |             |             |              |                      |                       |
| D0 <sup>□</sup>                            | 95.6% (194) | 96.4% (190) | 98.2% (111) | 96.5% (495)  | 0.749 <sup>±</sup>   |                       |
| D30                                        | 98.9% (184) | 100% (180)  | 98.1% (104) | 99.2% (468)  | 0.172 <sup>±</sup>   | 0.0225 <sup>^*</sup>  |
| M6                                         | 98.3% (178) | 98.9% (173) | 97.2% (105) | 98.3% (456)  | 0.594 <sup>±</sup>   | 0.7905 <sup>^</sup>   |
| A1                                         | 96.0% (166) | 98.2% (167) | 96.1% (99)  | 96.9% (432)  | 0.447 <sup>±</sup>   | 1.0000 <sup>^</sup>   |
| <b>ASA<sup>1</sup></b>                     |             |             |             |              |                      |                       |
| D0 <sup>□</sup>                            | 80.3% (163) | 83.8% (165) | 86.7% (98)  | 83.0% (426)  | 0.325 <sup>−</sup>   |                       |
| D30                                        | 86.6% (161) | 97.2% (175) | 83.0% (88)  | 89.8% (424)  | <0.001 <sup>±*</sup> | 0.0002 <sup>^*</sup>  |
| M6                                         | 82.9% (150) | 88.6% (155) | 81.5% (88)  | 84.7% (393)  | 0.187 <sup>−</sup>   | 1.0000 <sup>^</sup>   |
| A1                                         | 79.2% (137) | 85.9% (146) | 78.6% (81)  | 81.6% (364)  | 0.188 <sup>−</sup>   | 0.3961 <sup>^</sup>   |
| <b>ASA<sup>1</sup> + Dipyridamol</b>       |             |             |             |              |                      |                       |
| D0 <sup>□</sup>                            | 4.4% (9)    | 2.0% (4)    | 3.5% (4)    | 3.3% (17)    | 0.393 <sup>±</sup>   |                       |
| D30                                        | 2.2% (4)    | 0           | 3.8% (4)    | 1.7% (8)     | 0.022 <sup>±*</sup>  | 0.0703 <sup>^</sup>   |
| M6                                         | 2.8% (5)    | 1.1% (2)    | 3.7% (4)    | 2.4% (11)    | 0.358 <sup>±</sup>   | 1.0000 <sup>^</sup>   |
| A1                                         | 2.3% (4)    | 0           | 3.9% (4)    | 1.8% (8)     | 0.027 <sup>±*</sup>  | 0.2891 <sup>^</sup>   |
| <b>Clopidogrel</b>                         |             |             |             |              |                      |                       |
| D0 <sup>□</sup>                            | 16.3% (33)  | 20.3% (40)  | 16.8% (19)  | 17.9% (92)   | 0.539 <sup>−</sup>   |                       |
| D30                                        | 15.6% (29)  | 86.1% (155) | 18.9% (20)  | 43.2% (204)  | <0.001 <sup>−*</sup> | <0.0001 <sup>^*</sup> |
| M6                                         | 16.0% (29)  | 30.3% (53)  | 14.8% (16)  | 21.1% (98)   | 0.001 <sup>−*</sup>  | 0.1945 <sup>^</sup>   |
| A1                                         | 17.9% (31)  | 21.2% (36)  | 17.5% (18)  | 19.1% (85)   | 0.668 <sup>−</sup>   | 0.9088 <sup>^</sup>   |
| <b>Others</b>                              |             |             |             |              |                      |                       |
| D0 <sup>□</sup>                            | 1.0% (2)    | 1.5% (3)    | 0.9% (1)    | 1.2% (6)     | 0.878 <sup>±</sup>   |                       |
| D30                                        | 1.1% (2)    | 3.3% (6)    | 2.8% (3)    | 2.3% (11)    | 0.355 <sup>±</sup>   | 0.1250 <sup>^</sup>   |
| M6                                         | 1.7% (3)    | 1.7% (3)    | 0.9% (1)    | 1.5% (7)     | 1.000 <sup>±</sup>   | 0.6875 <sup>^</sup>   |
| A1                                         | 2.9% (5)    | 1.8% (3)    | 1.0% (1)    | 2.0% (9)     | 0.692 <sup>±</sup>   | 0.4531 <sup>^</sup>   |
| <b>Anticoagulants</b>                      |             |             |             |              |                      |                       |
| D0 <sup>□</sup>                            | 2.0% (4)    | 2.5% (5)    | 2.7% (3)    | 2.3% (12)    | 0.870 <sup>±</sup>   |                       |
| D30                                        | 1.6% (3)    | 4.0% (7)    | 1.9% (2)    | 2.6% (12)    | 0.389 <sup>±</sup>   | 1.0000 <sup>^</sup>   |
| M6                                         | 1.7% (3)    | 2.3% (4)    | 3.7% (4)    | 2.4% (11)    | 0.504 <sup>±</sup>   | 0.8036 <sup>^</sup>   |
| A1                                         | 4.0% (7)    | 5.3% (9)    | 4.9% (5)    | 4.7% (21)    | 0.859 <sup>−</sup>   | 0.0072 <sup>±*</sup>  |
| <b>Heparin</b>                             |             |             |             |              |                      |                       |
| D0 <sup>□</sup>                            | 0.5% (1)    | 1.5% (3)    | 1.8% (2)    | 1.2% (6)     | 0.518 <sup>±</sup>   |                       |
| D30                                        | 0.5% (1)    | 1.7% (3)    | 0           | 0.8% (4)     | 0.364 <sup>±</sup>   | 0.7539 <sup>^</sup>   |
| M6                                         | 0.6% (1)    | 0           | 0           | 0.2% (1)     | 1.000 <sup>±</sup>   | 0.1250 <sup>^</sup>   |
| A1                                         | 0           | 1.2% (2)    | 0           | 0.4% (2)     | 0.198 <sup>±</sup>   | 0.6875 <sup>^</sup>   |
| <b>Vitamin-K-antagonists</b>               |             |             |             |              |                      |                       |
| D0 <sup>□</sup>                            | 0.5% (1)    | 0.5% (1)    | 0.9% (1)    | 0.6% (3)     | 1.000 <sup>±</sup>   |                       |
| D30                                        | 0           | 1.1% (2)    | 1.9% (2)    | 0.8% (4)     | 0.125 <sup>±</sup>   | 1.0000 <sup>^</sup>   |
| M6                                         | 0.6% (1)    | 0.6% (1)    | 0.9% (1)    | 0.6% (3)     | 1.000 <sup>±</sup>   | 1.0000 <sup>^</sup>   |
| A1                                         | 1.7% (3)    | 3.5% (6)    | 1.9% (2)    | 2.5% (11)    | 0.588 <sup>±</sup>   | 0.0215 <sup>±*</sup>  |
| <b>Others</b>                              |             |             |             |              |                      |                       |
| D0 <sup>□</sup>                            | 1.5% (3)    | 0.5% (1)    | 0           | 0.8% (4)     | 0.546 <sup>±</sup>   |                       |
| D30                                        | 1.1% (2)    | 1.1% (2)    | 0           | 0.8% (4)     | 0.684 <sup>±</sup>   | 1.0000 <sup>^</sup>   |
| M6                                         | 0.6% (1)    | 1.7% (3)    | 2.8% (3)    | 1.5% (7)     | 0.270 <sup>±</sup>   | 0.1250 <sup>^</sup>   |
| A1                                         | 1.7% (3)    | 1.8% (3)    | 2.9% (3)    | 2.0% (9)     | 0.760 <sup>±</sup>   | 0.0391 <sup>±*</sup>  |
| <b>Antihypertensives</b>                   |             |             |             |              |                      |                       |
| D0 <sup>□</sup>                            | 85.7% (174) | 87.3% (172) | 90.3% (102) | 87.3% (448)  | 0.667 <sup>−</sup>   |                       |
| D30                                        | 94.0% (173) | 90.4% (160) | 93.4% (99)  | 92.5% (432)  | 0.393 <sup>−</sup>   | 0.0015 <sup>^*</sup>  |
| M6                                         | 94.5% (171) | 92.6% (162) | 93.5% (100) | 93.5% (433)  | 0.766 <sup>−</sup>   | 0.0002 <sup>^*</sup>  |
| A1                                         | 95.4% (165) | 95.3% (161) | 96.1% (99)  | 95.5% (425)  | 1.000 <sup>±</sup>   | <0.0001 <sup>^*</sup> |
| <b>ACE<sup>2</sup>-inhibitors</b>          |             |             |             |              |                      |                       |
| D0 <sup>□</sup>                            | 49.8% (101) | 49.7% (98)  | 46.9% (53)  | 49.1% (252)  | 0.867 <sup>−</sup>   |                       |
| D30                                        | 56.6% (105) | 55.0% (99)  | 49.1% (52)  | 54.2% (256)  | 0.459 <sup>−</sup>   | 0.0014 <sup>^*</sup>  |
| M6                                         | 58.0% (105) | 53.1% (93)  | 43.5% (47)  | 52.8% (245)  | 0.057 <sup>−</sup>   | 0.0869 <sup>^</sup>   |
| A1                                         | 55.5% (96)  | 56.5% (96)  | 47.6% (49)  | 54.0% (241)  | 0.319 <sup>−</sup>   | 0.0363 <sup>±*</sup>  |
| <b>Angiotensin-II-receptor-antagonists</b> |             |             |             |              |                      |                       |
| D0 <sup>□</sup>                            | 27.1% (55)  | 22.3% (44)  | 31.0% (35)  | 26.1% (134)  | 0.230 <sup>−</sup>   |                       |
| D30                                        | 30.6% (57)  | 22.8% (41)  | 36.8% (39)  | 29.0% (137)  | 0.034 <sup>−*</sup>  | 0.2430 <sup>^</sup>   |
| M6                                         | 29.8% (54)  | 24.0% (42)  | 38.0% (41)  | 29.5% (137)  | 0.043 <sup>−*</sup>  | 0.1114 <sup>^</sup>   |
| A1                                         | 27.7% (48)  | 25.9% (44)  | 38.8% (40)  | 29.6% (132)  | 0.060 <sup>−</sup>   | 0.0869 <sup>^</sup>   |
| <b>Diuretics</b>                           |             |             |             |              |                      |                       |
| D0 <sup>□</sup>                            | 45.3% (92)  | 30.5% (60)  | 38.1% (43)  | 38.0% (195)  | 0.009 <sup>−*</sup>  |                       |

## SPACE-2: Implementation of BMT

|                             |             |             |             |             |                     |                       |
|-----------------------------|-------------|-------------|-------------|-------------|---------------------|-----------------------|
| D30                         | 50.5% (94)  | 36.1% (65)  | 42.5% (45)  | 43.2% (204) | 0.020 <sup>-*</sup> | 0.0125 <sup>^*</sup>  |
| M6                          | 54.7% (99)  | 38.9% (68)  | 37.0% (40)  | 44.6% (207) | 0.002 <sup>-*</sup> | 0.0080 <sup>^*</sup>  |
| A1                          | 55.5% (96)  | 40.0% (68)  | 42.7% (44)  | 46.6% (208) | 0.011 <sup>-*</sup> | 0.0004 <sup>^*</sup>  |
| <b>Calcium antagonists</b>  |             |             |             |             |                     |                       |
| D0 <sup>□</sup>             | 29.6% (60)  | 23.9% (47)  | 24.8% (28)  | 26.3% (135) | 0.396 <sup>-</sup>  |                       |
| D30                         | 34.9% (65)  | 28.3% (51)  | 27.4% (29)  | 30.7% (145) | 0.272 <sup>-</sup>  | 0.0137 <sup>^*</sup>  |
| M6                          | 37.6% (68)  | 28.6% (50)  | 31.5% (34)  | 32.8% (152) | 0.185 <sup>-</sup>  | 0.0009 <sup>^*</sup>  |
| A1                          | 38.7% (67)  | 27.1% (46)  | 30.1% (31)  | 32.3% (144) | 0.060 <sup>-</sup>  | 0.0154 <sup>^*</sup>  |
| <b>Beta blockers</b>        |             |             |             |             |                     |                       |
| D0 <sup>□</sup>             | 51.7% (105) | 54.8% (108) | 55.8% (63)  | 53.8% (276) | 0.738 <sup>-</sup>  |                       |
| D30                         | 55.9% (104) | 56.7% (102) | 54.7% (58)  | 55.9% (264) | 0.950 <sup>-</sup>  | 0.3604 <sup>^</sup>   |
| M6                          | 58.6% (106) | 57.1% (100) | 54.6% (59)  | 57.1% (265) | 0.804 <sup>-</sup>  | 0.2370 <sup>^</sup>   |
| A1                          | 60.7% (105) | 56.5% (96)  | 56.3% (58)  | 58.1% (259) | 0.671 <sup>-</sup>  | 0.0414 <sup>^*</sup>  |
| <b>Others</b>               |             |             |             |             |                     |                       |
| D0 <sup>□</sup>             | 9.4% (19)   | 10.2% (20)  | 8.0% (9)    | 9.4% (48)   | 0.817 <sup>-</sup>  |                       |
| D30                         | 11.3% (21)  | 10.0% (18)  | 8.5% (9)    | 10.2% (48)  | 0.745 <sup>-</sup>  | 0.7359 <sup>^</sup>   |
| M6                          | 9.9% (18)   | 8.0% (14)   | 10.2% (11)  | 9.3% (43)   | 0.771 <sup>-</sup>  | 1.0000 <sup>^</sup>   |
| A1                          | 11.0% (19)  | 11.2% (19)  | 8.7% (9)    | 10.5% (47)  | 0.793 <sup>-</sup>  | 0.5682 <sup>^</sup>   |
| <b>Lipid-lowering-drugs</b> |             |             |             |             |                     |                       |
| D0 <sup>□</sup>             | 82.3% (167) | 78.7% (155) | 85.0% (96)  | 81.5% (418) | 0.455 <sup>-</sup>  |                       |
| D30                         | 89.7% (165) | 88.8% (159) | 94.3% (99)  | 90.4% (423) | 0.294 <sup>-</sup>  | <0.0001 <sup>^*</sup> |
| M6                          | 92.2% (166) | 88.0% (154) | 94.4% (102) | 91.1% (422) | 0.145 <sup>-</sup>  | <0.0001 <sup>^*</sup> |
| A1                          | 92.5% (160) | 88.2% (150) | 94.2% (97)  | 91.3% (407) | 0.185 <sup>-</sup>  | <0.0001 <sup>^*</sup> |
| <b>Statin</b>               |             |             |             |             |                     |                       |
| D0 <sup>□</sup>             | 80.3% (163) | 73.6% (145) | 78.8% (89)  | 77.4% (397) | 0.257 <sup>-</sup>  |                       |
| D30                         | 87.6% (163) | 86.7% (156) | 91.5% (97)  | 88.1% (416) | 0.456 <sup>-</sup>  | <0.0001 <sup>^*</sup> |
| M6                          | 91.7% (166) | 86.9% (152) | 93.5% (101) | 90.3% (419) | 0.131 <sup>-</sup>  | <0.0001 <sup>^*</sup> |
| A1                          | 92.5% (160) | 87.6% (149) | 93.2% (96)  | 90.8% (405) | 0.190 <sup>-</sup>  | <0.0001 <sup>^*</sup> |
| <b>Other</b>                |             |             |             |             |                     |                       |
| D0 <sup>□</sup>             | 6.9% (14)   | 6.6% (13)   | 7.1% (8)    | 6.8% (35)   | 0.986 <sup>-</sup>  |                       |
| D30                         | 2.7% (5)    | 6.7% (12)   | 7.5% (8)    | 5.3% (25)   | 0.118 <sup>-</sup>  | 0.2101 <sup>^</sup>   |
| M6                          | 4.4% (8)    | 6.3% (11)   | 5.6% (6)    | 5.4% (25)   | 0.735 <sup>-</sup>  | 0.3877 <sup>^</sup>   |
| A1                          | 5.2% (9)    | 6.5% (11)   | 5.8% (6)    | 5.8% (26)   | 0.882 <sup>-</sup>  | 0.6636 <sup>^</sup>   |
| <b>Antidiabetic drugs</b>   |             |             |             |             |                     |                       |
| D0 <sup>□</sup>             | 24.1% (49)  | 25.4% (50)  | 31.0% (35)  | 26.1% (134) | 0.422 <sup>-</sup>  |                       |
| D30                         | 21.9% (40)  | 25.8% (46)  | 28.3% (30)  | 24.8% (116) | 0.439 <sup>-</sup>  | 0.2500 <sup>^</sup>   |
| M6                          | 23.5% (42)  | 26.4% (46)  | 29.6% (32)  | 26.0% (120) | 0.508 <sup>-</sup>  | 0.3750 <sup>^</sup>   |
| A1                          | 23.1% (40)  | 27.8% (47)  | 30.1% (31)  | 26.5% (118) | 0.397 <sup>-</sup>  | 0.3438 <sup>^</sup>   |
| <b>Insulin</b>              |             |             |             |             |                     |                       |
| D0 <sup>□</sup>             | 9.4% (19)   | 7.6% (15)   | 9.7% (11)   | 8.8% (45)   | 0.760 <sup>-</sup>  |                       |
| D30                         | 9.7% (18)   | 8.3% (15)   | 9.4% (10)   | 9.1% (43)   | 0.897 <sup>-</sup>  | 1.0000 <sup>^</sup>   |
| M6                          | 10.5% (19)  | 9.1% (16)   | 11.1% (12)  | 10.1% (47)  | 0.849 <sup>-</sup>  | 0.0654 <sup>^</sup>   |
| A1                          | 9.2% (16)   | 8.8% (15)   | 9.7% (10)   | 9.2% (41)   | 0.970 <sup>-</sup>  | 0.1460 <sup>^</sup>   |
| <b>Oral antidiabetics</b>   |             |             |             |             |                     |                       |
| D0 <sup>□</sup>             | 18.7% (38)  | 21.3% (42)  | 23.9% (27)  | 20.9% (107) | 0.544 <sup>-</sup>  |                       |
| D30                         | 16.1% (30)  | 22.2% (40)  | 21.7% (23)  | 19.7% (93)  | 0.288 <sup>-</sup>  | 0.5488 <sup>^</sup>   |
| M6                          | 17.1% (31)  | 22.3% (39)  | 23.1% (25)  | 20.5% (95)  | 0.355 <sup>-</sup>  | 0.1185 <sup>^</sup>   |
| A1                          | 17.9% (31)  | 24.1% (41)  | 24.3% (25)  | 21.7% (97)  | 0.296 <sup>-</sup>  | 0.5413 <sup>^</sup>   |

\*significant; <sup>†</sup>Fisher's exact test; <sup>-</sup>Chi<sup>2</sup>-Test; <sup>^</sup>McNemar's test; BMI: Body mass index; <sup>1</sup>Acetylsalicylic acid; <sup>2</sup>Angiotensin converting enzyme; <sup>3</sup>testing CEA vs. CAS vs. BMT; <sup>4</sup>testing rate of medication (total) in D30/M6/A1 vs. screening visit; D0: Screening visit; <sup>□</sup>already published[1]; D30: Visit after 30 days; M6: Visit after six months; A1: Visit after one year.

**Table S4a:** Lipid level as a function of statin intake after 30 days; n=513.

|                                | statin use | CEA             | CAS              | BMT               | total            | $p^{\diamond}$        |
|--------------------------------|------------|-----------------|------------------|-------------------|------------------|-----------------------|
| Cholesterol (median [IQR])     | yes        | 169 (143; 193)  | 164 (148; 184)   | 156 (136; 180)    | 164 (144; 187)   | <0.0001 <sup>†*</sup> |
|                                | no         | 226 (210; 248)  | 199.5 (178; 231) | 216 (201.5; 228)  | 216 (197; 237)   |                       |
| LDL-Cholesterol (median [IQR]) | yes        | 91 (75; 112)    | 89 (74; 110)     | 84 (70.5; 102)    | 88 (73; 107)     | <0.0001 <sup>†*</sup> |
|                                | no         | 149 (125; 161)  | 117 (97; 153)    | 144.5 (137; 161)  | 138 (106; 159)   |                       |
| HDL-Cholesterol (median [IQR]) | yes        | 51 (45; 61)     | 43 (35.5; 46.5)  | 48.5 (42.5; 54)   | 49 (40; 60)      | 0.6006 <sup>†</sup>   |
|                                | no         | 49 (40; 60)     | 48 (41; 60)      | 50 (41; 59)       | 47 (42; 57)      |                       |
| Triglycerides (median [IQR])   | yes        | 118.5 (88; 190) | 111 (86; 167)    | 112 (82.5; 185.5) | 115 (86; 177)    | 0.0251 <sup>†*</sup>  |
|                                | no         | 143 (97; 177)   | 141 (104; 220)   | 154 (111.5; 174)  | 143.5 (100; 207) |                       |

\*significant; <sup>†</sup>Mann–Whitney U test for all patients; <sup>◇</sup>for total values; all values in mg/dl.

**Table S4b:** Lipid level as a function of statin intake after 6 months; n=513.

|                                | statin use | CEA              | CAS              | BMT              | total              | $p^{\diamond}$        |
|--------------------------------|------------|------------------|------------------|------------------|--------------------|-----------------------|
| Cholesterol (median [IQR])     | yes        | 172 (145; 195)   | 169 (152; 191)   | 160 (142; 172)   | 167 (145; 188)     | <0.0001 <sup>†*</sup> |
|                                | no         | 231.5 (198; 245) | 198.5 (182; 244) | 209 (157; 243)   | 211.5 (189; 243.5) |                       |
| LDL-Cholesterol (median [IQR]) | yes        | 94 (73; 113)     | 93 (80; 110.5)   | 85 (72; 98)      | 90 (75; 110)       | <0.0001 <sup>†*</sup> |
|                                | no         | 138 (119; 151)   | 121 (112; 157)   | 140 (104; 178)   | 137 (115; 154)     |                       |
| HDL-Cholesterol (median [IQR]) | yes        | 49 (40; 60)      | 49 (43; 61)      | 49 (41; 58)      | 49 (41; 60)        | 0.0508 <sup>†</sup>   |
|                                | no         | 47 (40; 58)      | 41.5 (36; 54)    | 45.5 (41; 56)    | 44 (39; 56)        |                       |
| Triglycerides (median [IQR])   | yes        | 129 (92; 190)    | 122.5 (90; 161)  | 107 (78; 144)    | 121 (88; 173)      | 0.0748 <sup>†</sup>   |
|                                | no         | 146 (76; 198)    | 159.5 (95; 274)  | 141.5 (113; 162) | 153 (95; 259)      |                       |

\*significant; <sup>†</sup>Mann–Whitney U test for all patients; <sup>◇</sup>for total values; all values in mg/dl.

**Table S4c:** Lipid level as a function of statin intake after 1 year; n=513.

|                                | statin use | CEA            | CAS              | BMT               | total              | $p^{\diamond}$        |
|--------------------------------|------------|----------------|------------------|-------------------|--------------------|-----------------------|
| Cholesterol (median [IQR])     | yes        | 167 (149; 196) | 165 (140.5; 187) | 162 (140; 181)    | 164.5 (145; 186.5) | <0.0001 <sup>†*</sup> |
|                                | no         | 220 (202; 232) | 206 (180; 227)   | 241 (201; 253)    | 214 (182.5; 231.5) |                       |
| LDL-Cholesterol (median [IQR]) | yes        | 91 (75; 115)   | 89.5 (70; 116)   | 85.5 (69; 103)    | 88 (72; 111)       | <0.0001 <sup>†*</sup> |
|                                | no         | 137 (121; 154) | 130 (103; 156)   | 147 (142; 163)    | 139.5 (111.5; 155) |                       |
| HDL-Cholesterol (median [IQR]) | yes        | 48 (41; 59)    | 49 (40; 58)      | 50 (43; 60)       | 49 (41; 59)        | 0.2557 <sup>†</sup>   |
|                                | no         | 47 (40; 59)    | 42 (36; 51)      | 50.5 (44; 73)     | 44 (37; 57)        |                       |
| Triglycerides (median [IQR])   | yes        | 135 (97; 186)  | 111 (85; 171)    | 132 (89.5; 170.5) | 126 (90; 174)      | 0.1994 <sup>†</sup>   |
|                                | no         | 124 (89; 197)  | 154 (94; 218)    | 166.5 (106; 218)  | 131 (94; 215)      |                       |

\*significant; <sup>†</sup>Mann–Whitney U test for total; <sup>◇</sup>for total values; all values in mg/dl.

## References

1. Reiff T, Eckstein HH, Mansmann U, Jansen O, Fraedrich G, Mudra H, et al. Angioplasty in asymptomatic carotid artery stenosis vs. endarterectomy compared to best medical treatment: One-year interim results of SPACE-2. *Int J Stroke*. 2020;15 6:638-49; doi: 10.1177/1747493019833017.
